# Supplementary material for: Contrasting guest binding interaction of cucurbit[7-8]urils with neutral red dye: controlled exchange of multiple guests
Source: Royal Society of Chemistry journal article supplement (doi:10.1039/b922778d), 2010-01-01
Supplement: b922778d.pdf [file b922778d.pdf]

## Supporting Information

### Contrasting guest binding interaction of cucurbit[7-8]urils with neutral red dye: Controlled exchange of multiple guests

Mhejabeen Shaikh, Sharmistha Dutta Choudhury, Jyotirmayee Mohanty,\* Achikanath C. Bhasikuttan,\*  
Haridas Pal

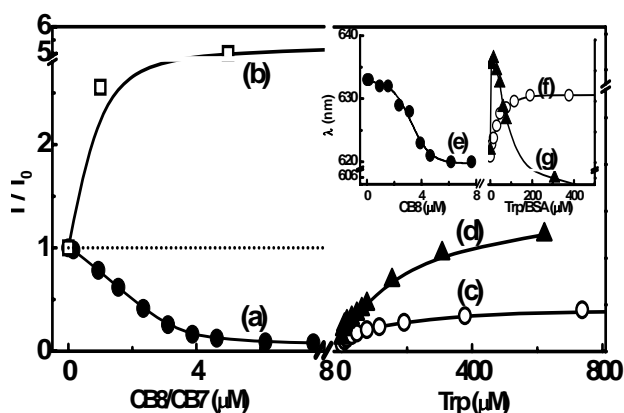

15 **Fig. S1:** Relative fluorescence intensity changes recorded for NRH<sup>+</sup>-CB8 (a) and NRH<sup>+</sup>-CB7 (b) interaction. (c) and (d) represent the recovery of fluorescence signal obtained when Tryptophan or BSA was added to the (NRH<sup>+</sup>)<sub>2</sub>.CB8 system, respectively. Inset shows the emission wavelength changes during NRH<sup>+</sup>-CB8 titration (e) and during the titration of 20 (NRH<sup>+</sup>)<sub>2</sub>.CB8 with Tryptophan (f) or BSA (g).

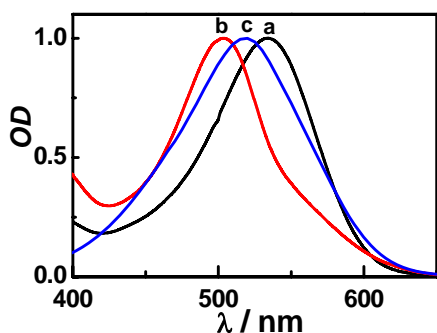

25 **Fig. S2:** Absorption spectra of an aqueous solution of NRH<sup>+</sup> without CB8 (a), with CB8 (b). Spectrum (c) represents the absorption spectrum recorded from a concentrated solution of NRH<sup>+</sup> using a 1mm path length, indicating the presence of a dimeric species.

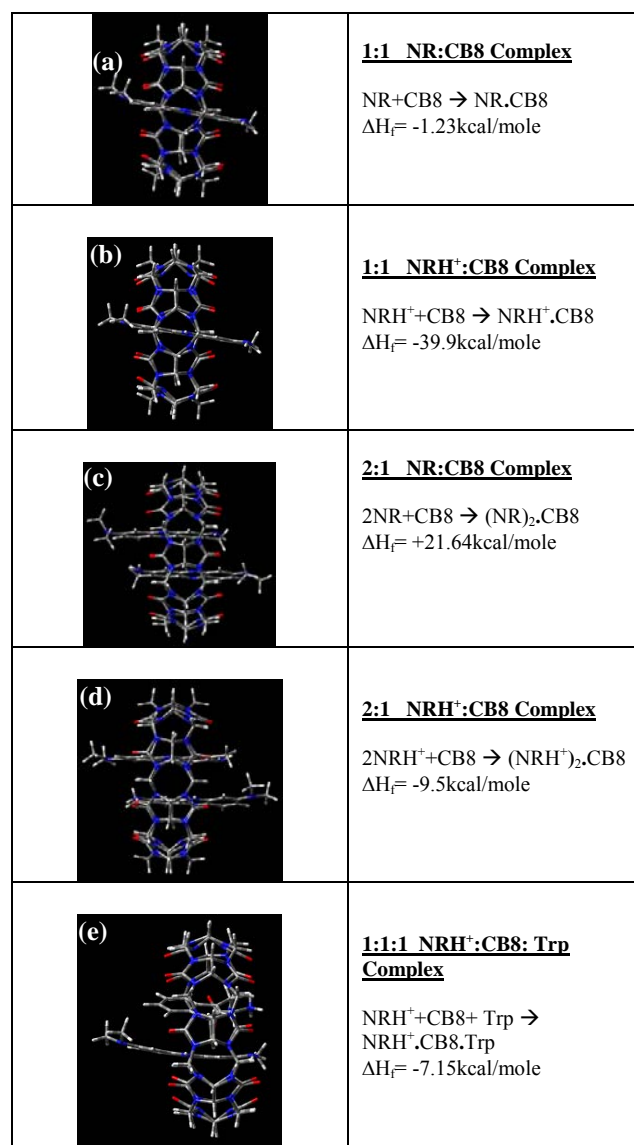

30 **Fig. S3:** Computationally optimized geometries of various stoichiometric arrangements for neutral red-CB8 interaction (a-d). Structure (e) represents the optimized geometry for the NRH<sup>+</sup>.CB8.Trp Complex.

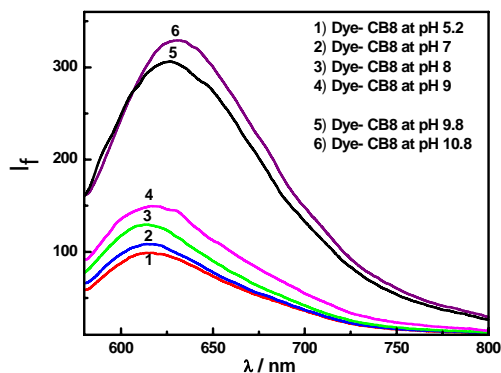

Fig. S4: The fluorescence spectra recorded for the neutral red-CB8 system at different pHs, maintain the excitation parameters the same

5

**Note: 1**

The binding curve obtained for  $\text{NRH}^+$ -CB8-BSA system (Fig.7, inset) were analyzed by the equations according to the following 1:1 interactions

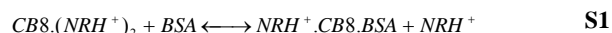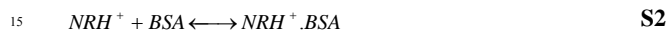

Taking  $[\text{Dye}]_0$  and  $[\text{BSA}]_0$  as the total concentrations of dye and BSA, respectively, eq. S3 applies for the concentration of free (uncomplexed) dye in equilibrium:

$$[\text{Dye}]_{eq} = \{K_{eq}[\text{Dye}]_0 - K_{eq}[\text{BSA}]_0 - 1 + \sqrt{(K_{eq}[\text{Dye}]_0 + K_{eq}[\text{BSA}]_0 + 1)^2 - 4K_{eq}^2[\text{Dye}]_0[\text{BSA}]_0}\} / 2K_{eq} \quad \text{S3}$$

Where  $[\text{Dye}]$  represents the concentration of  $\text{CB8} \cdot (\text{NRH}^+)_2$  complex for Eqn S1 and  $\text{NRH}^+$  for Eqn S2.

The fluorescence intensity can therefore be understood as a composite of the fluorescence intensity contributions from the complexed and uncomplexed forms according to eq. S4:

$$I_f = I_{\text{Dye}}^0 \frac{[\text{Dye}]_{eq}}{[\text{Dye}]_0} + I_{\text{Dye} \cdot \text{BSA}}^\infty \frac{[\text{Dye} \cdot \text{BSA}]_{eq}}{[\text{Dye}]_0} \quad \text{S4}$$

where  $I_{\text{Dye}}^0$  is the initial fluorescence intensity in the absence of CB8 and  $I_{\text{Dye} \cdot \text{BSA}}^\infty$  corresponds to the fluorescence intensity if all the dye molecules in the solution were complexed by BSA. The change in fluorescence intensity ( $\Delta I_f$ ) can be obtained by rearrangement (eq.S5):

$$\Delta I_f^\lambda = \left(1 - \frac{[\text{Dye}]_{eq}}{[\text{Dye}]_0}\right) (I_{\text{Dye} \cdot \text{BSA}}^\infty - I_{\text{Dye}}^0) \quad \text{S5}$$

In the fluorescence titrations, we employed the fluorescence intensity as experimental measure. The concentration of (Dye) was kept constant at a particular pH 5 and the concentration of BSA was varied. The binding constants (K) obtained from the nonlinear fittings of the experimental data using Eqn. S5 were  $2.5 \times 10^5 \text{ M}^{-1}$  for the  $\text{CB8} \cdot (\text{NRH}^+)_2$  complex with BSA and  $3 \times 10^3 \text{ M}^{-1}$  for the  $\text{NRH}^+$  with BSA.
